# Supplementary material
Source: PubMed Central journal article supplement (PMC8060917)
Supplement: NIHMS1503421-supplement-2.pdf [file NIHMS1503421-supplement-2.pdf]

A.

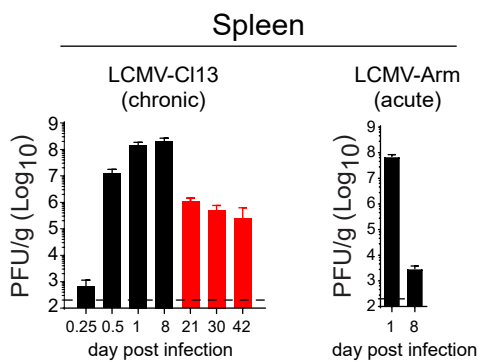

B.

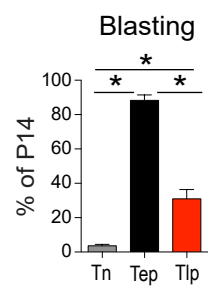

C.

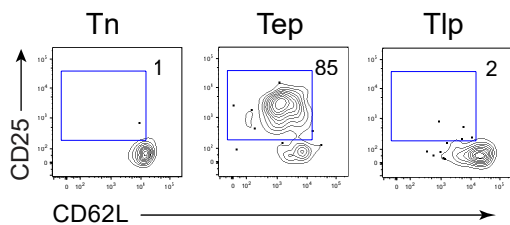

D.

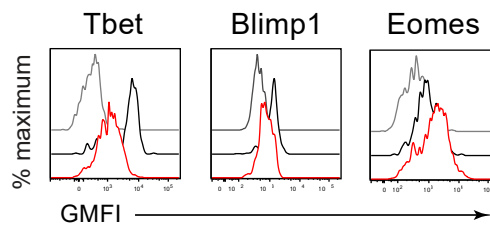

**Figure S1. Splenic viral titers during LCMV infection and differentiation profile of virus-specific CD8<sup>+</sup> T cells primed in established persistent infection 60 hours after priming.**

**Related to Figure 1**

**(A)** Splenic viral titers during LCMV-Cl13 infection (left) and LCMV-Arm infection (right).

Infectious viral titers were determined by plaque assay.

**(B)** Proportion of blasting T<sub>n</sub>, T<sub>ep</sub> or T<sub>Ip</sub> P14 cells 60hrs after priming.

**(C)** Proportion of CD25<sup>hi</sup> CD62L<sup>lo</sup> P14 cells 60hrs after priming.

**(D)** GMFI of Tbet, Blimp1 and Eomes in T<sub>n</sub> (gray), T<sub>ep</sub> (black) and T<sub>Ip</sub> (red) virus-specific P14 cell.

Data are representative of 3 or more independent experiments with 3-5 mice per group. Error bars indicate standard deviation (SD). Significance was determined by one-way ANOVA, \* p<0.05.

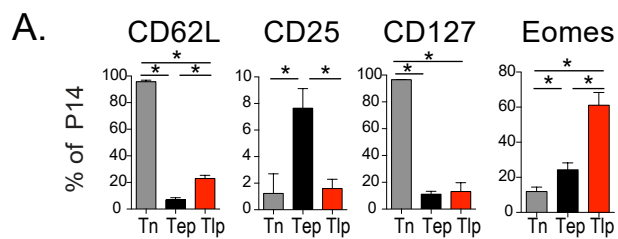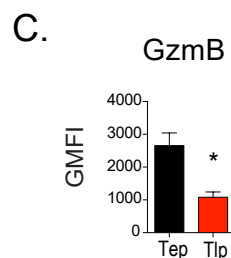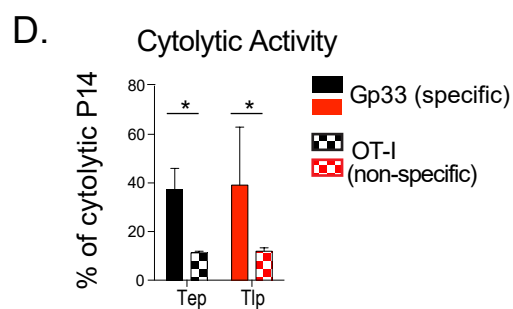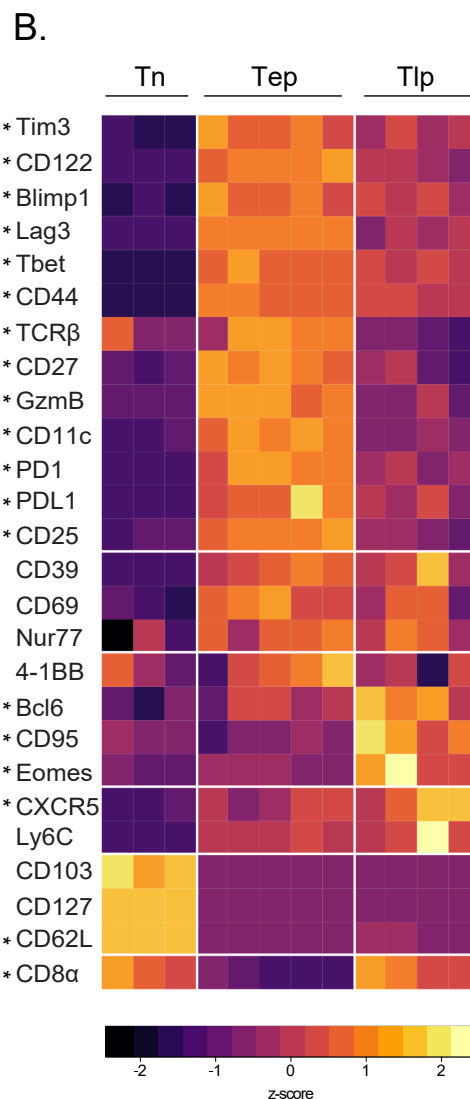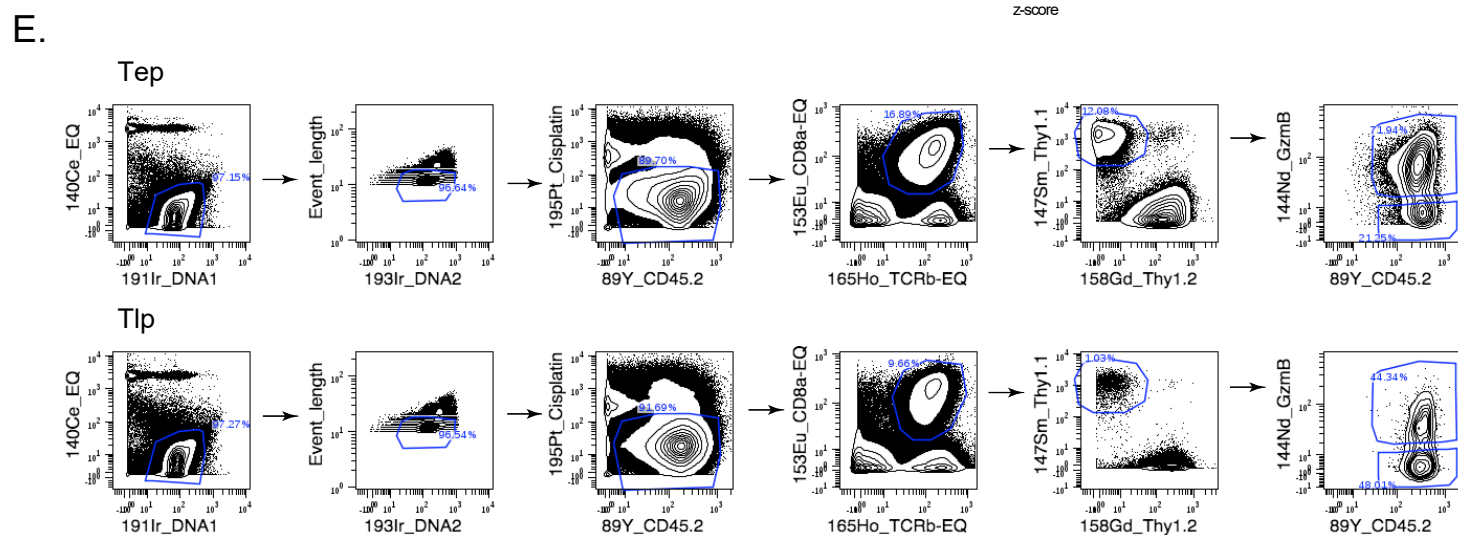

**Figure S2. Virus-specific CD8<sup>+</sup> T cells primed in an established persistent infection undergo an alternative pathway of transcriptional and effector differentiation 8 days after priming. Related to Figure 2**

**(A)** Proportion of CD62L, CD25, CD127 and Eomes positive T<sub>n</sub>, T<sub>ep</sub> and T<sub>ip</sub> P14 T cells 8 days after priming.

**(B)** Heat map depicts MSI or GMFI of indicated extracellular markers and transcription factors derived from CyTOF and flow cytometry. Rows are scaled by z-score. \*, represents  $p < 0.05$  between T<sub>ep</sub> and T<sub>ip</sub> cells. Significance was calculated by t-test.

**(C)** Bar graph depicts the GMFI of GzmB<sup>+</sup> virus-specific P14 T cells.

**(D)** Percentage of cytolytic T<sub>ep</sub> or T<sub>ip</sub> P14 cells to targets labeled with LCMV-GP<sub>33-41</sub> (solid) or non-specific OT-I peptide (patterned).

**(E)** Back gating of GzmB<sup>+</sup> and GzmB<sup>-</sup> T<sub>ep</sub> and T<sub>ip</sub> populations by mass cytometry.

Data are representative of 3 or more independent experiments with 3-5 mice per group. Error bars indicate SD. Significance was determined by t-test or one-way ANOVA (Figure A). \*,  $p < 0.05$ .

A.

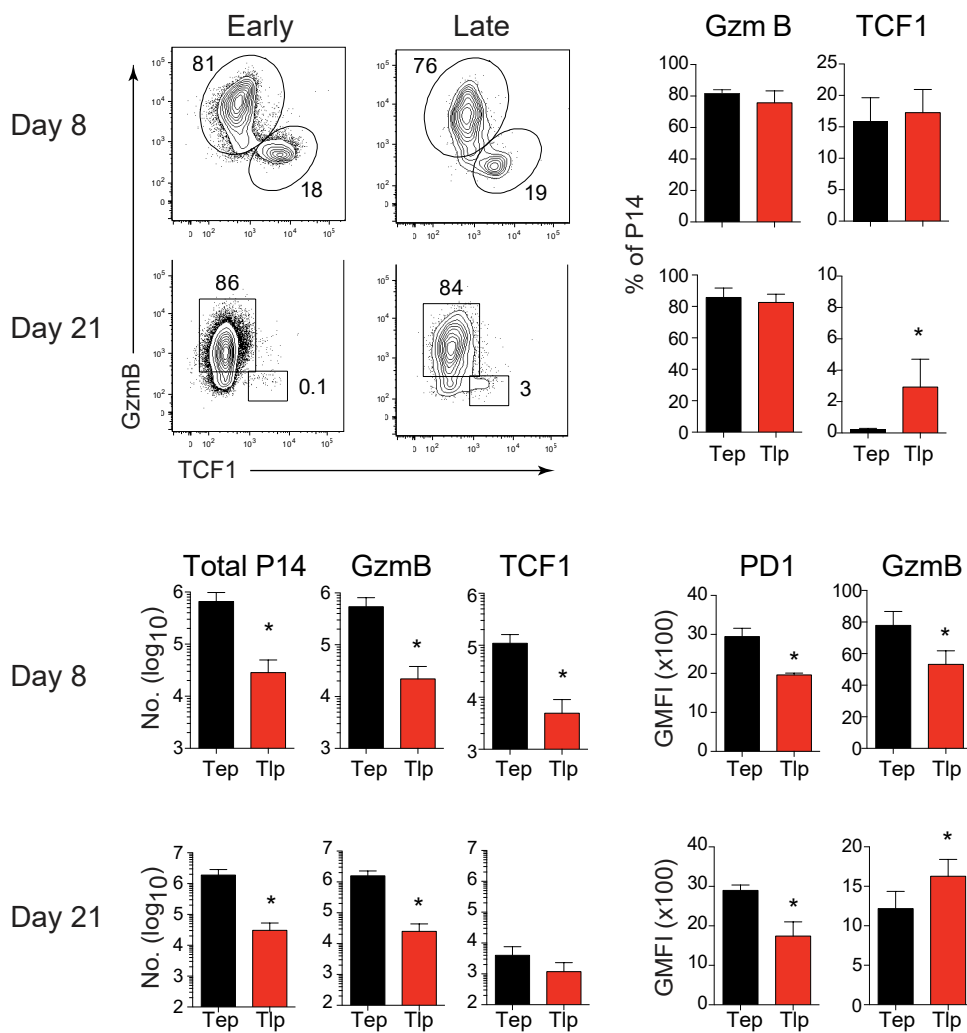

B.

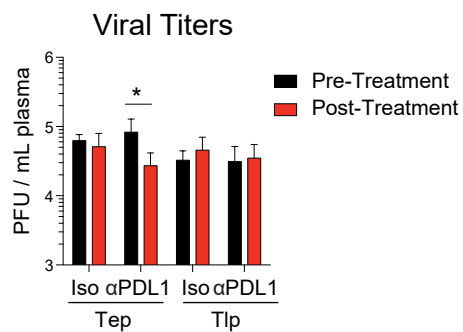

**Figure S3. Characterization of liver-infiltrating T<sub>ep</sub> and T<sub>lp</sub>, and viral titers pre- and post-anti-PDL1 blockade. Related to Figure 3**

(A) CD8<sup>+</sup> P14 T<sub>ep</sub> and T<sub>lp</sub> cell responses were analyzed in the liver 8 days and 21 days following transfer. Flow plots and bar graphs show both proportion and number of GzmB<sup>+</sup> and TCF1<sup>+</sup> P14 T<sub>ep</sub> or T<sub>lp</sub> cell subsets. Bar graphs also show GMFI of PD1 and GzmB in P14 T cells.

(B) Mice were CD4<sup>+</sup> depleted prior to LCMV infection to maintain high viral titers. Graph shows plasma viral titers pre- (day 20 after priming) and post- (day 35 after priming) isotype or anti-PDL1 antibody treatment.

Data are representative of 2 independent experiments with 5 mice per group. Error bars indicate SD. Significance was determined by t-test. \*, p<0.05.

Figure S4

A.

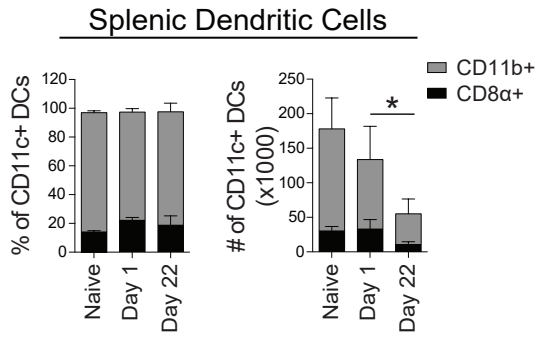

B.

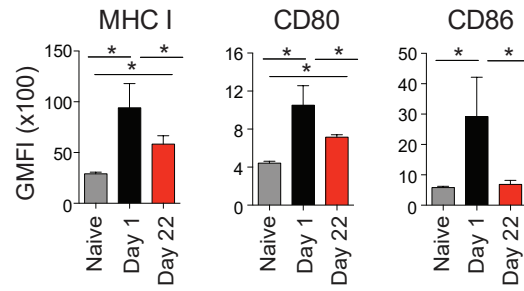

C.

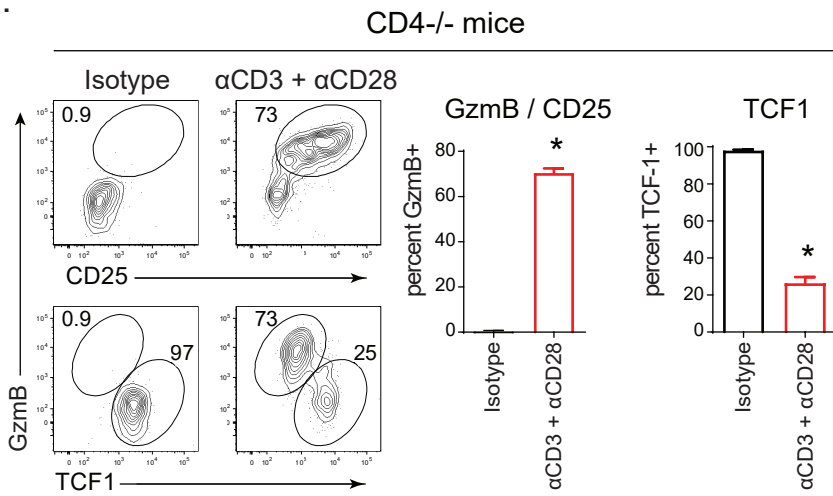

D.

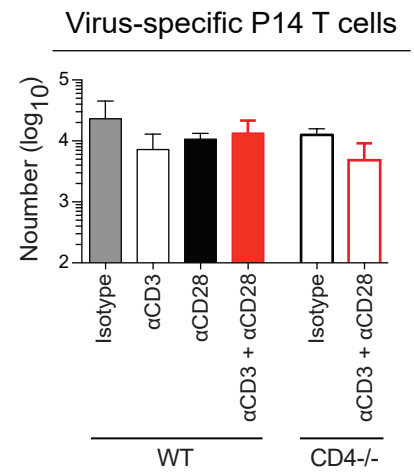

E.

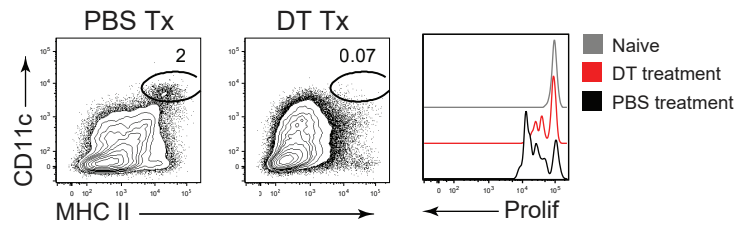

F.

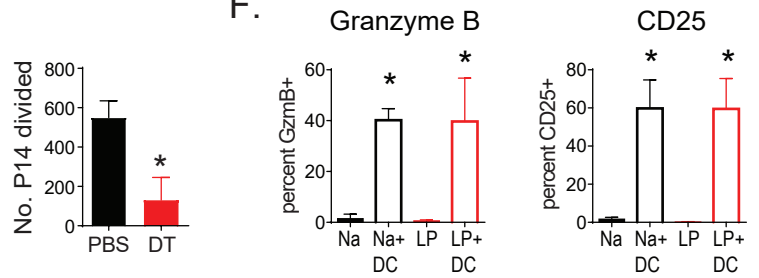

**Figure S4. Role of dendritic cells and T cell stimulatory signal strength in T1p cell differentiation. Related to Figure 4**

**(A)** Proportion and number of CD8 $\alpha$ <sup>+</sup> and CD11b<sup>+</sup> DCs in naïve mice (day 0) and at 1 day and 22 days after LCMV-CI13 infection (i.e., 1 day after early and late priming).

**(B)** GMFI of MHC I, CD80 and CD86 on macrophages (CD45<sup>+</sup>, CD3<sup>-</sup>, NK1.1<sup>-</sup>, B220<sup>-</sup>, CD11c<sup>-</sup>, Ly6G<sup>-</sup>, CD11b<sup>+</sup>) in naïve mice (day 0, gray) and at 1 day (black) and 22 days (red) after LCMV-CI13 infection.

**(C)** CD8<sup>+</sup> P14 T cells were transferred into CD4<sup>-/-</sup> mice that had been infected 21 days earlier with LCMV-CI13. Four hours after P14 T cell transfer, mice were treated i.p. with anti-CD3 and anti-CD28 or isotype control. Flow plots and bar graphs depict the frequency of GzmB<sup>+</sup> CD25<sup>+</sup> effector and TCF-1<sup>+</sup> memory-like P14 cells 60 hours after transfer.

**(D)** Bar graphs represent the number of T1p P14 cells in WT and CD4<sup>-/-</sup> mice 60 hours after priming and treatment with isotype, anti-CD3 and/or anti-CD28 agonist antibodies.

**(E)** DT or control PBS was injected into LCMV-CI13-infected CD11c-DTR mice to deplete CD11c<sup>+</sup> DCs prior to late priming of P14 T cells (on D20 after LCMV-CI13 infection). Flow plots depict DC depletion with DT treatment at time of sacrifice (40 hours after P14 priming). Histogram depicts division of late primed P14 T cells with DT treatment (red) or with control PBS treatment (black). Bar graph show the number of divided P14 T cells.

**(F)** CD8<sup>+</sup> P14 T cells were transferred into naïve mice (Na) or into mice infected 21 days before with the LCMV-CI13(V35A) variant (T1p = LP). At the time of priming, a group of naïve (Na + DC) and LCMV-CI13(V35A) infected mice (LP + DC) received GP<sub>33-41</sub> peptide loaded bmDC (open bars). Bar graphs represent the percent of GzmB and CD25 expressing P14s 60 hours after transfer.

Data are representative of 2 independent experiments with 4-5 mice per group. Error bars indicate SD. Significance was determined by t-test. \*, p<0.05



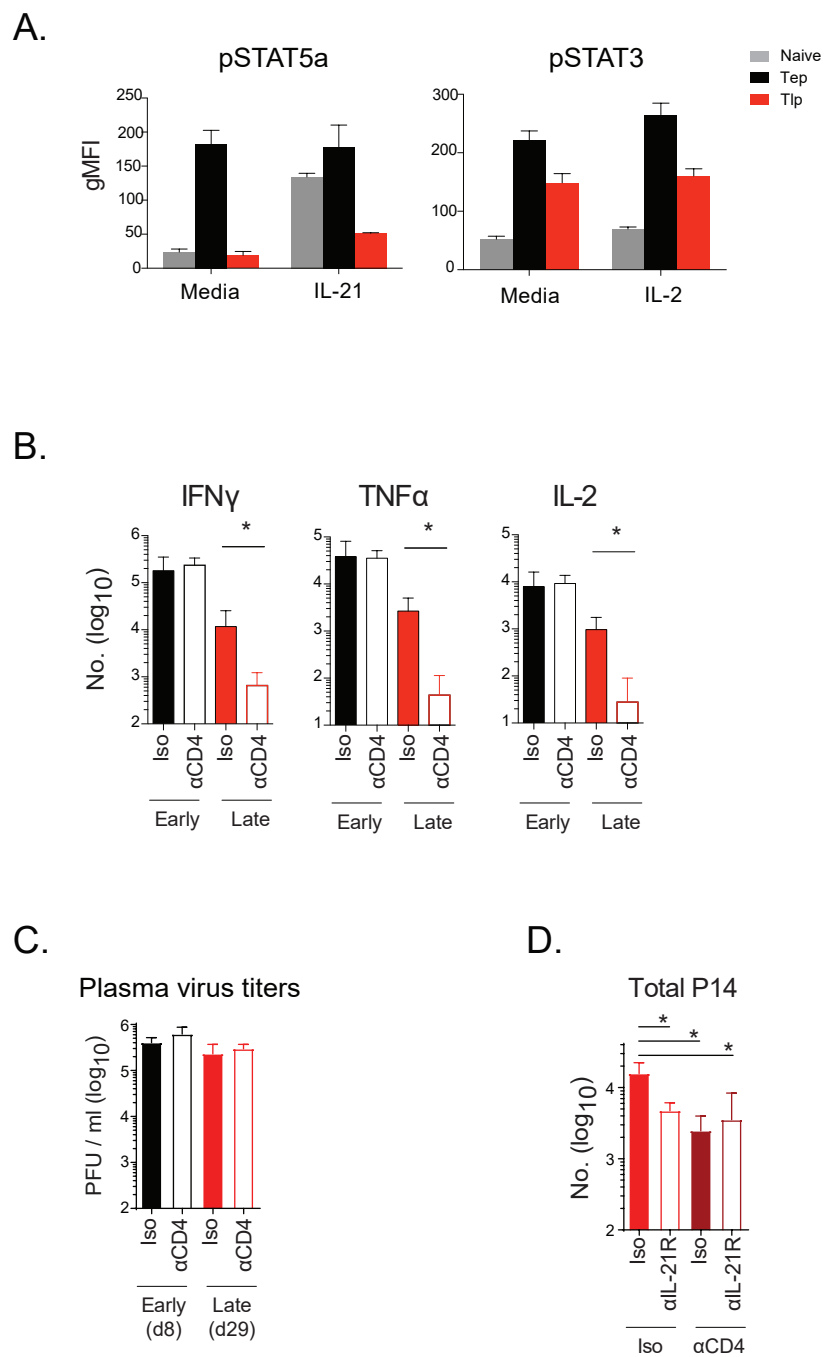

**Figure S5. CD4<sup>+</sup> T cell help and IL-21 mediated effects on T<sub>ep</sub> and T<sub>ip</sub> cells. Related to Figure 6**

**(A)** Bar graphs depict the GMFI of phosphoSTAT5a and phosphoSTAT3 in P14 T<sub>n</sub>, T<sub>ep</sub> or T<sub>ip</sub> cells 60 hours after priming in vivo and then cultured without stimulation (media) or following IL-2 or IL-21 treatment for 30 minutes.

**(B-C)** Mice were either CD4<sup>+</sup> depleted (open bars) or isotype control treated (shaded bars) prior to LCMV-CI13 infection. CD8<sup>+</sup> P14 T cells were transferred into naïve mice that were immediately infected with LCMV-CI13 (black) or into mice that had been infected with LCMV-CI13 21 days before (red). **(B)** Bar graphs depict the number of IFN $\gamma$ , TNF $\alpha$  and IL-2 producing P14 T cells and **(C)** the plasma virus titers at day 8 (early prime) and day 29 (late prime) in isotype treated mice (i.e., CD4<sup>+</sup> non-depleted) or CD4<sup>+</sup> depleted mice.

**(D)** Mice were either CD4<sup>+</sup> depleted or isotype control treated prior to LCMV-CI13 infection. CD8<sup>+</sup> P14 T cells were transferred into mice that had been infected with LCMV-CI13 21 days before. Mice were either treated with isotype control (shaded bars) or anti-IL-21R blocking antibody (open bars) starting at day 20 through sacrifice at day 29. Bar graph depicts the number of total P14 T cells at day 8 post priming (day 29 of LCMV-CI13 infection).

Data are representative of 2 independent experiments with 4-5 mice per group. Error bars indicate SD. Significance was determined by t-test \*, p<0.05.

A.

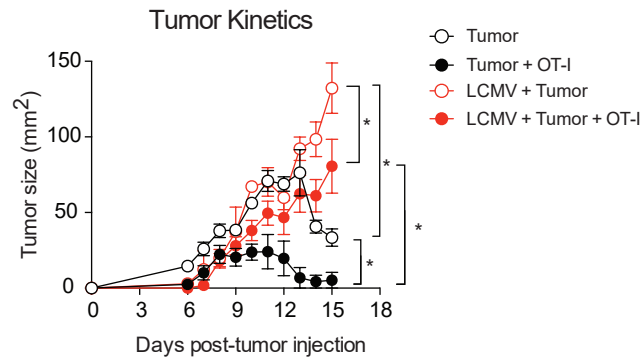

B.

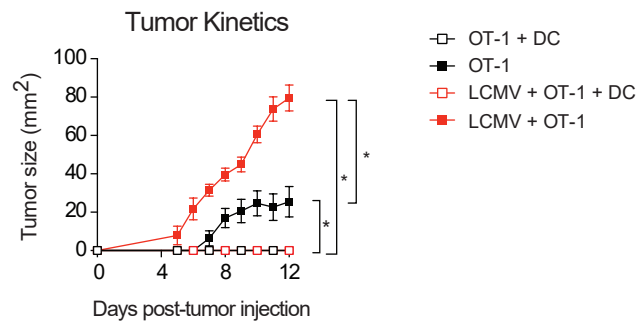

**Figure S6. Tumor kinetics in chronically infected mice, effect of OT-I cells and dendritic cells. Related to Figure 7**

**(A)** Naïve (black) or mice infected with LCMV-Cl13 for 21 days (red) either received OT-I cells (shaded circles) or no cells (open circles). One day later EG7 tumors were injected into all mice. Graph depicts tumor growth kinetics on the indicated day after tumor injection.

**(B)** OT-I cells were injected into naïve mice (black) or mice that had been infected for 21 days with LCMV-Cl13 (red). One day later EG7 tumors were injected into all mice either alone (closed squares) or in combination with OVA-peptide pulsed DCs (open squares). Graph depicts tumor growth kinetics on the indicated day after tumor injection.

Data are representative of 2 independent experiments with 4-5 mice per group. Error bars indicate SD. Statistical differences between groups was measured by two-way ANOVA \*  $p < 0.05$ .

| Antibody Specificity | Metal Tag | Clone        | Manufacturer  | Catalog number |
|----------------------|-----------|--------------|---------------|----------------|
| CD45                 | 89Y       | 30-F11       | Fluidigm (d)  | 3089005B       |
| Ly6c                 | 115Ln     | HK14         | BioLegend     | 128002         |
| CD44                 | 141Pr     | IM7          | BioLegend     | 103002         |
| CXCR5                | 142Nd     | 145502       | BioLegend     | L138D7         |
| GzmB                 | 144 Nd    | GB11         | Thermofischer | MA1-80734      |
| Eomes                | 146 Nd    | Dan11mag     | eBioscience   | 14-4875-80     |
| Thy1.1               | 147Sm     | HIS51        | eBioscience   | 14-0900-85     |
| CD11b                | 148Nd     | M1/70        | Fluidigm (d)  | 3148003B       |
| CD69                 | 149Sm     | H1.273       | BioLegend     | 104502         |
| Ly6G                 | 150Nd     | 1A8          | BioLegend     | 127602         |
| CD25                 | 151Eu     | 3C7          | Fluidigm (d)  | 3151007B       |
| BCL6                 | 152Sm     | K112.91      | BD Bioscience | 561520         |
| CD8a                 | 153Eu     | 53-6.7       | Fluidigm (d)  | 3153012B       |
| CD103                | 155Gd     | M290         | BD Bioscience | 553699         |
| PDL1                 | 156Gd     | M1H5         | eBioscience   | 14-5982-85     |
| Thy1.2               | 158Gd     | 53-21        | Thermofischer | 14-0902-82     |
| CD39                 | 159Tb     | 24DMS1       | eBioscience   | 14-0391-82     |
| CD4                  | 160Gd     | rm4-5        | BioLegend     | 100506         |
| Tbet                 | 161Dy     | 4B10         | Fluidigm (d)  | 3161014B       |
| TCR $\beta$          | 165Ho     | 109202       | BioLegend     | H57-597        |
| B220                 | 166Er     | RA3-6B2      | Thermofischer | 14-0452-85     |
| SLAM                 | 169Tm     | TC15-12F12.2 | BioLegend     | 115933         |
| Nk1.1                | 170Er     | PK136        | Fluidigm (d)  | 3170002B       |
| CD95                 | 172Yb     | 15A7         | eBioscience   | 14-0951-85     |
| CD11c                | 174Yb     | N418         | BioLegend     | 117302         |
| PD1                  | 175Lu     | RMP-30       | BioLegend     | 109104         |
| MHC-II               | 209Bi     | M5/114.15.2  | Fluidigm (d)  | 3209006B       |

**Table S1. Antibody panel for mass cytometry. Related to Figure 1 and Figure 2**

Antibodies that were purchased directly conjugated are labeled with (d). Other antibodies were conjugated with Fluidigm's Maxpar conjugation kit according to manufacturer's instructions.

| <b>Pathway in Paper</b>            | <b>Pathway Name</b>                                | <b>Database</b>                 | <b>Accession number</b>                            |
|------------------------------------|----------------------------------------------------|---------------------------------|----------------------------------------------------|
| Myc targets                        | HALLMARK_MYC_TARGETS_V1                            | MSIGDB_C2                       | HALLMARK_MYC_TARGETS_V1                            |
| Ribosome Biogenesis                | RIBOSOME BIOGENESIS                                | GOBP                            | GO_0042254                                         |
| Translation                        | TRANSLATION                                        | REACTOME                        | R-HSA-72766.3                                      |
| MTORC1 signaling                   | HALLMARK_MTORC1_SIGNALING                          | MSIGDB_C2                       | HALLMARK_MTORC1_SIGNALING                          |
| DNA replication                    | DNA REPLICATION                                    | REACTOME DATABASE ID RELEASE 61 | 69306                                              |
| Glycolysis                         | GLYCOLYSIS                                         | REACTOME DATABASE ID RELEASE 61 | 70171                                              |
| Integrin family interactions       | INTEGRIN FAMILY CELL SURFACE INTERACTIONS          | PID NCI-NATURE                  | INTEGRIN FAMILY CELL SURFACE INTERACTIONS          |
| Regulation of cell motility        | REGULATION OF CELL MOTILITY                        | GOBP                            | GO_2000145                                         |
| Signaling by focal adhesion kinase | SIGNALING EVENTS MEDIATED BY FOCAL ADHESION KINASE | PID NCI-NATURE                  | SIGNALING EVENTS MEDIATED BY FOCAL ADHESION KINASE |
| Actin cytoskeleton organization    | REGULATION OF ACTIN CYTOSKELETON ORGANIZATION      | GOBP                            | GO_0032956                                         |
| Cell-cell adhesion                 | Cell-Cell adhesion                                 | GOBP                            | GO_0098609                                         |

**Table S2. Selected pathways from Enrichment Map Gene Set. Related to Figure 5B**

| <b>Pathway Name in Paper</b>         | <b>Standard Name</b>                                                                                               |
|--------------------------------------|--------------------------------------------------------------------------------------------------------------------|
| Effector vs memory cells CD8 T cells | GOLDRATH_EFF_VS_MEMORY_CD8_TCELL_DN<br>GOLDRATH_EFF_VS_MEMORY_CD8_TCELL_UP                                         |
| Acute vs chronic LCMV CD8 T cells    | GSE30962_ACUTE_VS_CHRONIC_LCMV_PRIMARY_INF_CD8_TCELL_DN<br>GSE30962_ACUTE_VS_CHRONIC_LCMV_PRIMARY_INF_CD8_TCELL_UP |
| IL-2 treated CD8 T cell              | GSE39110_UNTREATED_VS_IL2_TREATED_CD8_TCELL_D<br>AY3_POST_IMMUNIZATION_DN                                          |
| IL-21 treated CD8 T cell             | GSE19198_CTRL_VS_IL21_TREATED_TCELL_24H_DN                                                                         |

**Table S3. Selected pathways from immunesigDB. Related to Figure 5C and 5E**
